# Supplementary material for: The genetic underpinnings of variation in ages at menarche and natural menopause among women from the multi-ethnic Population Architecture using Genomics and Epidemiology (PAGE) Study: A trans-ethnic meta-analysis
Source: PubMed Central journal article supplement (PMC6059436; doi:10.1371/journal.pone.0200486), 2018-07-25
Supplement: pone.0200486.s003.pdf [file pone.0200486.s003.pdf]

| Supplemental Table 1: Evidence of generalization at 46 previously described* age at menarche and natural menopause sites across multiple race/ethnic groups |              |                       |                               |                                          |                  |           |          |        |       |         |         |        |          |        |                          |        |        |        |        |          |        |        |        |        |                |        |          |        |        |        |        |        |        |       |                                |       |       |      |       |        |      |          |       |    |                                         |    |    |    |    |    |    |    |    |    |    |    |    |    |    |    |    |    |    |
|-------------------------------------------------------------------------------------------------------------------------------------------------------------|--------------|-----------------------|-------------------------------|------------------------------------------|------------------|-----------|----------|--------|-------|---------|---------|--------|----------|--------|--------------------------|--------|--------|--------|--------|----------|--------|--------|--------|--------|----------------|--------|----------|--------|--------|--------|--------|--------|--------|-------|--------------------------------|-------|-------|------|-------|--------|------|----------|-------|----|-----------------------------------------|----|----|----|----|----|----|----|----|----|----|----|----|----|----|----|----|----|----|
| GWAS/Array-Wide Significant Ref*                                                                                                                            | SNP          | GWAS Catalog Allele** | GWAS Catalog Inverse Allele** | Unavailable Index SNP- Decreasing Allele | African American |           |          |        |       |         |         |        |          |        | Hispanic/Latina American |        |        |        |        |          |        |        |        |        | Asian American |        |          |        |        |        |        |        |        |       | American Indian/Alaskan Native |       |       |      |       |        |      |          |       |    | Modified Random-Effects Trans-Ethnic*** |    |    |    |    |    |    |    |    |    |    |    |    |    |    |    |    |    |    |
|                                                                                                                                                             |              |                       |                               |                                          | Chr              | BP        | Gene*    | Code   | Beta  | P-value | P-value | Direct | Direct   | Direct | Direct                   | Direct | Direct | Direct | Direct | Direct   | Direct | Direct | Direct | Direct | Direct         | Direct | Direct   | Direct | Direct | Direct | Direct | Direct | Direct |       |                                |       |       |      |       |        |      |          |       |    |                                         |    |    |    |    |    |    |    |    |    |    |    |    |    |    |    |    |    |    |
|                                                                                                                                                             |              |                       |                               |                                          |                  |           |          |        |       |         |         |        |          |        |                          |        |        |        |        |          |        |        |        |        |                |        |          |        |        |        |        |        |        | Freq  | tency                          | SE    | SE    | SE   | SE    | SE     | SE   | SE       | SE    | SE | SE                                      | SE | SE | SE | SE | SE | SE | SE | SE | SE | SE | SE | SE | SE | SE | SE | SE | SE | SE |
|                                                                                                                                                             |              |                       |                               |                                          |                  |           |          |        |       |         |         |        |          |        |                          |        |        |        |        |          |        |        |        |        |                |        |          |        |        |        |        |        |        |       |                                |       |       |      |       |        |      |          |       |    |                                         |    |    |    |    |    |    |    |    |    |    |    |    |    |    |    |    |    |    |
| Gene*                                                                                                                                                       | Gene*        | Gene*                 | Gene*                         | Gene*                                    | Gene*            | Gene*     | Gene*    | Gene*  | Gene* | Gene*   | Gene*   | Gene*  | Gene*    | Gene*  | Gene*                    | Gene*  | Gene*  | Gene*  | Gene*  | Gene*    | Gene*  | Gene*  | Gene*  | Gene*  | Gene*          | Gene*  | Gene*    | Gene*  | Gene*  | Gene*  | Gene*  |        |        |       |                                |       |       |      |       |        |      |          |       |    |                                         |    |    |    |    |    |    |    |    |    |    |    |    |    |    |    |    |    |    |
| <b>MENARCHE</b>                                                                                                                                             |              |                       |                               |                                          |                  |           |          |        |       |         |         |        |          |        |                          |        |        |        |        |          |        |        |        |        |                |        |          |        |        |        |        |        |        |       |                                |       |       |      |       |        |      |          |       |    |                                         |    |    |    |    |    |    |    |    |    |    |    |    |    |    |    |    |    |    |
| Periv et al., 2014 (Nature)                                                                                                                                 | rs668099*    | T                     | G                             | rs274465-G                               | 1                | 44117006  | KDMA4    | PTPRF  | T     | 0.210   | -0.018  | 0.02   | 0.378    | 0.995  | 20146                    | 1      | 247    | -0.055 | 0.02   | 0.200    | 0.100  | 15347  | 1      | 253    | -0.027         | 0.03   | 0.339    | 0.512  | 8273   | 1      | 263    | -0.193 | 0.13   | 0.134 | 538                            | 1     | 0.227 | 0.17 | -0.31 | -0.032 | 0.01 | 0.030    | 43766 | 22 | 1                                       |    |    |    |    |    |    |    |    |    |    |    |    |    |    |    |    |    |    |
| Periv et al., 2014 (Nature)                                                                                                                                 | rs1088994**  | C                     | T                             | rs1011336-C                              | 1                | 7282821   | NEGR1    |        | T     | 0.337   | 0.016   | 0.02   | 0.367    | 0.883  | 20200                    | 0      | 680    | -0.004 | 0.02   | 0.858    | 0.866  | 15336  | 1      | 893    | -0.009         | 0.04   | 0.827    | 0.980  | 8253   | 1      | 608    | 0.040  | 0.11   | 0.716 | 538                            | 1     | 0.569 | 0.32 | -0.01 | 0.006  | 0.01 | 0.726    | 43789 | 22 | 0                                       |    |    |    |    |    |    |    |    |    |    |    |    |    |    |    |    |    |    |
| Periv et al., 2014 (Nature)                                                                                                                                 | rs3845344**  | T                     | C                             | rs7514705-T                              | 1                | 75001480  | TNFRK1   | TYW3   | T     | 0.135   | 0.054   | 0.03   | 0.202    | 0.288  | 20209                    | 0      | 461    | -0.016 | 0.02   | 0.448    | 0.346  | 15345  | 1      | 692    | -0.015         | 0.03   | 0.562    | 0.817  | 8272   | 1      | 404    | -0.119 | 0.12   | 0.303 | 538                            | 1     | 0.362 | 0.11 | -0.73 | 0.009  | 0.02 | 0.361    | 43826 | 22 | 0                                       |    |    |    |    |    |    |    |    |    |    |    |    |    |    |    |    |    |    |
| Ekis et al., 2010                                                                                                                                           | rs333715     | C                     | T                             |                                          | 1                | 17762580  | SEC16B   |        | T     | 0.102   | -0.013  | 0.03   | 0.668    | 0.142  | 19987                    | 1      | 183    | -0.066 | 0.03   | 0.173    | 0.586  | 15346  | 1      | 204    | -0.013         | 0.03   | 0.684    | 0.164  | 8272   | 1      | 164    | 0.012  | 0.15   | 0.308 | 538                            | 1     | 0.149 | 0.02 | -0.23 | -0.035 | 0.02 | 0.654    | 39055 | 19 | 1                                       |    |    |    |    |    |    |    |    |    |    |    |    |    |    |    |    |    |    |
| Periv et al., 2014 (Nature)                                                                                                                                 | rs823114**   | G                     | A                             | rs951366-C                               | 1                | 205719532 | NUCKS1   | RAB7L1 | T     | 0.754   | -0.044  | 0.02   | 0.024    | 0.146  | 20199                    | 1      | 589    | -0.064 | 0.02   | 0.202    | 0.098  | 15343  | 1      | 469    | -0.008         | 0.02   | 0.744    | 0.819  | 8266   | 1      | 568    | -0.100 | 0.11   | 0.382 | 538                            | 1     | 0.636 | 0.38 | -0.80 | -0.042 | 0.02 | 1.36E-03 | 43808 | 22 | 1                                       |    |    |    |    |    |    |    |    |    |    |    |    |    |    |    |    |    |    |
| Ekis et al., 2010                                                                                                                                           | rs2947411    | G                     | A                             |                                          | 2                | 614168    | TMEM18   |        | T     | 0.773   | 0.033   | 0.02   | 0.095    | 0.635  | 20205                    | 0      | 846    | -0.033 | 0.03   | 0.240    | 0.669  | 15346  | 1      | 907    | -0.132         | 0.04   | 0.002    | 0.731  | 8259   | 1      | 816    | 0.010  | 0.15   | 0.946 | 538                            | 1     | 0.831 | 0.75 | -0.94 | -0.008 | 0.02 | 0.189    | 43810 | 22 | 1                                       |    |    |    |    |    |    |    |    |    |    |    |    |    |    |    |    |    |    |
| Periv et al., 2014 (Nature)                                                                                                                                 | rs6551276**  | C                     | T                             | rs6484248-T                              | 3                | 88199298  | ZNF584   | HTR1F  | T     | 0.622   | -0.002  | 0.02   | 0.916    | 0.895  | 20203                    | 1      | 832    | -0.042 | 0.03   | 0.125    | 0.243  | 15348  | 1      | 893    | -0.030         | 0.04   | 0.463    | 0.217  | 8271   | 1      | 818    | -0.254 | 0.14   | 0.078 | 538                            | 1     | 0.748 | 0.59 | -0.92 | -0.015 | 0.01 | 0.362    | 43820 | 22 | 1                                       |    |    |    |    |    |    |    |    |    |    |    |    |    |    |    |    |    |    |
| Ekis et al., 2010                                                                                                                                           | rs2500959*   | G                     | A                             | rs439371-A                               | 3                | 132015454 | TMEM108  | PPP3   | T     | 0.367   | 0.012   | 0.02   | 0.462    | 0.302  | 20124                    | 0      | 570    | -0.009 | 0.02   | 0.651    | 0.574  | 15338  | 1      | 736    | -0.018         | 0.03   | 0.488    | 0.855  | 8163   | 1      | 656    | -0.043 | 0.11   | 0.693 | 537                            | 1     | 0.516 | 0.34 | -0.79 | -0.001 | 0.01 | 0.504    | 43625 | 22 | 1                                       |    |    |    |    |    |    |    |    |    |    |    |    |    |    |    |    |    |    |
| Periv et al., 2014 (Nature)                                                                                                                                 | rs17451107** | C                     | T                             | rs900400-C                               | 3                | 15679769  | LEKR1    | CCN14  | C     | 0.344   | -0.034  | 0.02   | 0.056    | 0.517  | 20207                    | 1      | 0.415  | -0.045 | 0.02   | 0.027    | 0.641  | 15345  | 1      | 462    | -0.005         | 0.02   | 0.831    | 0.888  | 8288   | 1      | 379    | -0.113 | 0.11   | 0.320 | 538                            | 1     | 0.388 | 0.31 | -0.48 | -0.031 | 0.01 | 0.015    | 43820 | 22 | 1                                       |    |    |    |    |    |    |    |    |    |    |    |    |    |    |    |    |    |    |
| Periv et al., 2014 (Nature)                                                                                                                                 | rs13130484** | T                     | C                             | rs10936397-G                             | 4                | 45175691  | GPRD42   |        | T     | 0.248   | -0.046  | 0.02   | 0.019    | 0.764  | 20208                    | 1      | 0.376  | -0.029 | 0.02   | 0.165    | 0.518  | 15348  | 1      | 281    | -0.008         | 0.03   | 0.765    | 0.319  | 8271   | 1      | 367    | -0.013 | 0.11   | 0.909 | 538                            | 1     | 0.294 | 0.22 | -0.40 | -0.031 | 0.01 | 0.022    | 43825 | 22 | 1                                       |    |    |    |    |    |    |    |    |    |    |    |    |    |    |    |    |    |    |
| Periv et al., 2014 (Nature)                                                                                                                                 | rs2308020*   | A                     | G                             | rs13138534-C                             | 4                | 95186055  | SIACR4D1 |        | T     | 0.866   | -0.040  | 0.03   | 0.117    | 0.850  | 20201                    | 1      | 0.667  | -0.005 | 0.02   | 0.810    | 0.751  | 15342  | 1      | 521    | -0.003         | 0.02   | 0.854    | 0.946  | 8273   | 1      | 658    | -0.072 | 0.11   | 0.529 | 538                            | 1     | 0.716 | 0.46 | -0.89 | -0.014 | 0.01 | 0.386    | 43816 | 22 | 1                                       |    |    |    |    |    |    |    |    |    |    |    |    |    |    |    |    |    |    |
| Periv et al., 2014 (Nature)                                                                                                                                 | rs1480212**  | A                     | C                             | rs9447700-T                              | 6                | 77180707  | IMP2     |        | A     | 0.750   | -0.017  | 0.02   | 0.403    | 0.708  | 20207                    | 1      | 0.354  | 0.026  | 0.02   | 0.236    | 0.510  | 15347  | 0      | 410    | -0.059         | 0.02   | 0.017    | 0.175  | 8270   | 1      | 0.338  | -0.052 | 0.12   | 0.677 | 538                            | 1     | 0.547 | 0.27 | -0.18 | -0.015 | 0.01 | 0.389    | 43824 | 22 | 1                                       |    |    |    |    |    |    |    |    |    |    |    |    |    |    |    |    |    |    |
| Periv et al., 2014 (Nature)                                                                                                                                 | rs9373571**  | T                     | A                             | rs239198-C                               | 6                | 101133834 | SIM1     | ASCC3  | T     | 0.854   | 0.040   | 0.03   | 0.156    | 0.870  | 15159                    | 0      | 589    | -0.033 | 0.02   | 0.113    | 0.889  | 15306  | 1      | 710    | -0.014         | 0.03   | 1.00E-10 | 0.733  | 8269   | 1      | 698    | 0.086  | 0.11   | 0.437 | 538                            | 1     | 0.723 | 0.54 | -0.88 | -0.007 | 0.02 | 0.747    | 30505 | 14 | 1                                       |    |    |    |    |    |    |    |    |    |    |    |    |    |    |    |    |    |    |
| Periv et al., 2009 (Nat Genet), Ekis et al., 2010                                                                                                           | rs7759398    | T                     | C                             | rs7759398                                | 6                | 105376954 | LXN3B    |        | T     | 0.464   | -0.080  | 0.02   | 2.15E-06 | 0.911  | 20206                    | 1      | 0.719  | -0.196 | 0.02   | 2.22E-06 | 0.971  | 15345  | 1      | 702    | -0.171         | 0.03   | 1.00E-10 | 0.733  | 8269   | 1      | 698    | -0.302 | 0.12   | 0.011 | 538                            | 1     | 0.601 | 0.42 | -0.76 | -0.108 | 0.01 | 4.71E-18 | 43800 | 22 | 1                                       |    |    |    |    |    |    |    |    |    |    |    |    |    |    |    |    |    |    |
| Ekis et al., 2010                                                                                                                                           | rs9401888**  | G                     | A                             | rs1361108-T                              | 6                | 12687523  | C6orf173 | TRMT11 | T     | 0.224   | -0.051  | 0.02   | 0.013    | 0.229  | 20206                    | 1      | 0.627  | -0.039 | 0.02   | 0.071    | 0.742  | 15344  | 1      | 775    | -0.006         | 0.07   | 0.927    | 0.648  | 5089   | 1      | 535    | -0.267 | 0.12   | 0.029 | 538                            | 1     | 1.048 | 0.19 | -0.99 | -0.044 | 0.02 | 0.005    | 40639 | 21 | 1                                       |    |    |    |    |    |    |    |    |    |    |    |    |    |    |    |    |    |    |
| Ekis et al., 2010                                                                                                                                           | rs6473015**  | C                     | A                             | rs7821178-A                              | 6                | 78178485  | PXK3P    |        | C     | 0.139   | -0.020  | 0.02   | 0.427    | 0.637  | 20167                    | 1      | 0.249  | -0.013 | 0.02   | 0.580    | 0.908  | 15345  | 1      | 211    | -0.026         | 0.03   | 0.388    | 0.637  | 8270   | 1      | 240    | -0.058 | 0.12   | 0.639 | 538                            | 1     | 1.192 | 0.13 | -0.28 | -0.018 | 0.01 | 0.294    | 43802 | 22 | 1                                       |    |    |    |    |    |    |    |    |    |    |    |    |    |    |    |    |    |    |
| Periv et al., 2014 (Nature)                                                                                                                                 | rs2737557**  | T                     | G                             | rs7885498-G                              | 9                | 10270339  | PTFRD    |        | T     | 0.642   | -0.027  | 0.02   | 0.127    | 0.631  | 20162                    | 1      | 0.489  | -0.040 | 0.02   | 0.949    | 0.461  | 15342  | 1      | 509    | -0.020         | 0.02   | 0.418    | 0.862  | 8265   | 1      | 431    | 0.105  | 0.11   | 0.348 | 538                            | 1     | 0.571 | 0.48 | -0.09 | -0.030 | 0.01 | 0.020    | 43769 | 22 | 1                                       |    |    |    |    |    |    |    |    |    |    |    |    |    |    |    |    |    |    |
| Periv et al., 2009 (Nat Genet), Ekis et al., 2010                                                                                                           | rs2090409    | A                     | C                             |                                          | 9                | 108967088 | TMEM33B  |        | A     | 0.325   | -0.087  | 0.02   | 0.728    | 0.532  | 20162                    | 1      | 0.432  | -0.034 | 0.02   | 0.165    | 0.601  | 8249   | 1      | 324    | -0.043         | 0.12   | 0.700    | 538    | 1      | 358    | 0.30   | -0.47  | -0.060 | 0.02  | 1.35E-04                       | 28222 | 15    | 1    |       |        |      |          |       |    |                                         |    |    |    |    |    |    |    |    |    |    |    |    |    |    |    |    |    |    |
| Periv et al., 2014 (Nature)                                                                                                                                 | rs7870597**  | C                     | T                             | rs11792861-C                             | 9                | 111871864 | TMEM245  |        | C     | 0.069   | -0.035  | 0.03   | 0.308    | 0.008  | 20196                    | 1      | 0.275  | -0.010 | 0.02   | 0.674    | 0.804  | 15342  | 1      | 268    | -0.002         | 0.03   | 0.938    | 0.817  | 8284   | 1      | 0.275  | 0.009  | 0.12   | 0.942 | 538                            | 1     | 0.175 | 0.04 | -0.30 | -0.015 | 0.02 | 0.535    | 43802 | 22 | 1                                       |    |    |    |    |    |    |    |    |    |    |    |    |    |    |    |    |    |    |
| Periv et al., 2014 (Nature)                                                                                                                                 | rs7086481**  | T                     | A                             | rs1915146-A                              | 10               | 126844523 | C12orf2  |        | T     | 0.419   | -0.027  | 0.02   | 0.108    | 0.781  | 20199                    | 1      | 0.454  | -0.054 | 0.02   | 0.010    | 0.223  | 15347  | 1      | 763    | 0.020          | 0.03   | 0.488    | 0.557  | 8269   | 0      | 504    | -0.098 | 0.11   | 0.378 | 538                            | 1     | 0.500 | 0.40 | -0.81 | -0.028 | 0.01 | 0.033    | 43815 | 22 | 1                                       |    |    |    |    |    |    |    |    |    |    |    |    |    |    |    |    |    |    |
| Ekis et al., 2010                                                                                                                                           | rs4929923    | C                     | T                             | rs4929923                                | 11               | 8639200   | TRN66    |        | C     | 0.592   | -0.017  | 0.02   | 0.354    | 0.908  | 20198                    | 1      | 0.875  | -0.021 | 0.02   | 0.310    | 0.576  | 15347  | 1      | 393    | -0.056         | 0.02   | 0.024    | 0.393  | 8273   | 0      | 609    | -0.153 | 0.11   | 0.714 | 538                            | 1     | 1.061 | 0.37 | -0.90 | -0.028 | 0.01 | 0.037    | 43818 | 22 | 1                                       |    |    |    |    |    |    |    |    |    |    |    |    |    |    |    |    |    |    |
| Ekis et al., 2010                                                                                                                                           | rs909145     | T                     | C                             |                                          | 11               | 13203905  | ARN7L    |        | T     | 0.468   | -0.005  | 0.02   | 0.788    | 0.423  | 20182                    | 1      | 0.645  | -0.015 | 0.02   | 0.486    | 0.400  | 15312  | 1      | 630    | 0.012          | 0.02   | 0.628    | 0.691  | 8258   | 0      | 658    | 0.009  | 0.12   | 0.941 | 537                            | 1     | 0.555 | 0.44 | -0.76 | -0.004 | 0.01 | 0.816    | 43752 | 22 | 1                                       |    |    |    |    |    |    |    |    |    |    |    |    |    |    |    |    |    |    |
| Periv et al., 2014 (Nature)                                                                                                                                 | rs7103411    | T                     | C                             |                                          | 11               | 27701125  | BDNF     |        | T     | 0.912   | 0.005   | 0.03   | 0.860    | 0.010  | 20207                    | 0      | 818    | -0.068 | 0.03   | 0.009    | 0.698  | 15346  | 1      | 604    | -0.060         | 0.03   | 0.018    | 0.904  | 8272   | 1      | 636    | -0.087 | 0.15   | 0.654 | 538                            | 1     | 0.818 | 0.52 | -0.82 | -0.045 | 0.02 | 0.006    | 43825 | 22 | 1                                       |    |    |    |    |    |    |    |    |    |    |    |    |    |    |    |    |    |    |
| Ekis et al., 2010                                                                                                                                           | rs2450138**  | C                     | T                             | rs10898489-C                             | 11               | 77524070  | ARNTL2   |        | C     | 0.842   | -0.062  | 0.02   | 0.007    | 0.738  | 20205                    | 1      | 0.723  | -0.015 | 0.02   | 0.814    | 0.935  | 15339  | 0      | 480    | -0.029         | 0.03   | 0.255    | 0.989  | 8272   | 1      | 754    | 0.039  | 0.14   | 0.781 | 538                            | 1     | 0.762 |      |       |        |      |          |       |    |                                         |    |    |    |    |    |    |    |    |    |    |    |    |    |    |    |    |    |    |
