# Supplementary material for: The genetic underpinnings of variation in ages at menarche and natural menopause among women from the multi-ethnic Population Architecture using Genomics and Epidemiology (PAGE) Study: A trans-ethnic meta-analysis
Source: PubMed Central journal article supplement (PMC6059436; doi:10.1371/journal.pone.0200486), 2018-07-25
Supplement: pone.0200486.s004.pdf [file pone.0200486.s004.pdf]

Supplemental Table 2: Best marker SNPs at seven previously described age at menarche and natural menopause loci on the MetaboChip across multiple race/ethnic groups

| GWAS Ref                 | Gene(s) | Chr | Start BP  | Stop BP   | number of SNPs | Me tabochip SNPs | Bonferoni P-value* | Index GWAS SNP | Position  | African American     |           |                   | Hispanic/Latina American |        |         | Asian American        |        |                      | Modified Random-Effects Trans-Ethnic** |                   |              |       |         |                       |                 |                      |          |                   |              |    |         |                       |      |                      |          |                   |              |           |         |                       |       |       |        |       |                 |       |
|--------------------------|---------|-----|-----------|-----------|----------------|------------------|--------------------|----------------|-----------|----------------------|-----------|-------------------|--------------------------|--------|---------|-----------------------|--------|----------------------|----------------------------------------|-------------------|--------------|-------|---------|-----------------------|-----------------|----------------------|----------|-------------------|--------------|----|---------|-----------------------|------|----------------------|----------|-------------------|--------------|-----------|---------|-----------------------|-------|-------|--------|-------|-----------------|-------|
|                          |         |     |           |           |                |                  |                    |                |           | Top MetaboChip p-SNP | Position  | Minor Allele Freq | Beta (years)             | SE     | P-value | P-value heterogeneity | N      | Top MetaboChip p-SNP | Position                               | Minor Allele Freq | Beta (years) | SE    | P-value | P-value heterogeneity | N               | Top MetaboChip p-SNP | Position | Minor Allele Freq | Beta (years) | SE | P-value | P-value heterogeneity | N    | Top MetaboChip p-SNP | Position | Minor Allele Freq | Beta (years) | SE        | P-value | P-value heterogeneity | N     |       |        |       |                 |       |
| <b>MENARCHE</b>          |         |     |           |           |                |                  |                    |                |           |                      |           |                   |                          |        |         |                       |        |                      |                                        |                   |              |       |         |                       |                 |                      |          |                   |              |    |         |                       |      |                      |          |                   |              |           |         |                       |       |       |        |       |                 |       |
| Elks et al., 2010        | SEC11B  | 1   | 177753776 | 177935525 | 767            | 177              | 1.72E-04           | rs633715       | 177852580 | rs75552107           | 177925677 | G                 | 0.158                    | 0.127  | 0.04    | 6.85E-04              | 0.891  | 18599                | rs76368018                             | 17777983          | A            | 0.003 | -0.825  | 0.21                  | <b>9.42E-05</b> | 0.028                | 12787    | rs7518576         | 177849863    | T  | 0.459   | 0.081                 | 0.03 | 1.19E-03             | 0.885    | 8285              | rs6043388    | 177877979 | C       | 0.43                  | 0.28  | -0.63 | -0.060 | 0.01  | <b>3.39E-05</b> | 31549 |
| Elks et al., 2010        | TAF11B  | 2   | 471136    | 718889    | 1126           | 299              | 1.67E-04           | rs2947411      | 614168    | rs75510553           | 552918    | G                 | 0.049                    | -0.160 | 0.05    | 3.92E-04              | 0.555  | 14815                | rs79782235                             | 86392             | T            | 0.002 | -0.536  | 0.28                  | 9.04E-04        | 0.888                | 12384    | rs6756518         | 651483       | A  | 0.093   | 0.153                 | 0.04 | 2.59E-04             | 0.901    | 8262              | rs113407925  | 836868    | A       | 0.10                  | 0.05  | -0.14 | 0.093  | 0.02  | 2.69E-04        | 24173 |
| Elks et al., 2010        | TRIM6   | 11  | 8394189   | 8707147   | 672            | 185              | 2.70E-04           | rs4929923      | 8639200   | rs10500703           | 8433864   | A                 | 0.062                    | -0.112 | 0.04    | 1.72E-03              | 0.743  | 20209                | rs35296353                             | 8414229           | T            | 0.016 | 0.233   | 0.08                  | 4.94E-03        | 0.936                | 15347    | rs10743071        | 8395342      | C  | 0.462   | 0.073                 | 0.02 | 2.37E-03             | 0.001    | 8273              | rs11042029   | 8688125   | A       | 0.50                  | 0.35  | -0.70 | -0.038 | 0.01  | <b>6.84E-03</b> | 37938 |
| Perry et al., 2014       | BDNF    | 11  | 27482706  | 27749725  | 691            | 202              | 2.48E-04           | rs7103411      | 27700125  | rs113940328          | 27630168  | C                 | 0.063                    | 0.140  | 0.04    | <b>2.31E-04</b>       | 0.510  | 20209                | rs11030104                             | 27884517          | G            | 0.173 | 0.076   | 0.03                  | 5.04E-03        | 0.851                | 15346    | rs491850          | 27749725     | C  | 0.412   | 0.073                 | 0.02 | 3.38E-03             | 0.933    | 8273              | rs4923463    | 27672500  | G       | 0.18                  | 0.06  | -0.43 | 0.068  | 0.02  | <b>3.64E-05</b> | 43824 |
| Perry et al., 2014       | GPRC5B  | 16  | 19704224  | 20019432  | 784            | 220              | 2.27E-04           | rs12446632     | 19935389  | rs7195687            | 19647370  | C                 | 0.369                    | 0.058  | 0.02    | 8.69E-04              | 0.911  | 20173                | rs72771066                             | 19960913          | G            | 0.156 | -0.078  | 0.03                  | 5.92E-03        | 0.286                | 15344    | rs72771069        | 19962816     | T  | 0.069   | -0.278                | 0.09 | 3.23E-03             | 0.596    | 8273              | rs72771069   | 19962816  | T       | 0.07                  | -0.01 | -0.12 | -0.073 | 0.03  | 4.20E-03        | 43172 |
| Elks et al., 2010        | FTO     | 16  | 53539509  | 54185787  | 1817           | 557              | 8.98E-05           | rs49939609     | 53820527  | rs76299885           | 53950231  | A                 | 0.136                    | -0.119 | 0.04    | 3.48E-03              | 0.483  | 19545                | rs112372930                            | 53868024          | A            | 0.017 | 0.325   | 0.09                  | 5.28E-04        | 0.112                | 13627    | rs150356630       | 53830590     | T  | 0.075   | -0.198                | 0.05 | 1.43E-04             | 0.864    | 8273              | rs11642841   | 53845487  | A       | 0.15                  | 0.09  | 0.27  | -0.073 | 0.02  | <b>2.07E-05</b> | 43797 |
| <b>NATURAL MENOPAUSE</b> |         |     |           |           |                |                  |                    |                |           |                      |           |                   |                          |        |         |                       |        |                      |                                        |                   |              |       |         |                       |                 |                      |          |                   |              |    |         |                       |      |                      |          |                   |              |           |         |                       |       |       |        |       |                 |       |
| Stolk et al., 2012       | FTO     | 16  | 53539509  | 54185787  | 1817           | 752              | 8.91E-05           | rs49939609     | 53820527  | rs76299885           | 53950231  | G                 | 0.063                    | -0.204 | 0.084   | 4.42E-04              | 0.0819 | 7297                 | rs2949800                              | 2868815           | T            | 0.084 | 0.32    | 0.103                 | 1.92E-03        | 0.8014               | 5268     | rs11900743        | 28626860     | A  | 0.011   | -0.807                | 0.23 | 4.68E-04             | 0.2229   | 2316              | rs8608353    | 28426725  | A       | 0.29                  | 0.01  | -0.62 | -0.075 | 0.059 | <b>2.97E-04</b> | 16913 |

\*Bonferroni correction for the number of SNPs (n=2) in region in MetaboChip data from the ARIC African Americans (n=1419 males, n=2332 females, using a 50-SNP window and printing the window in each direction by 5 SNPs).  
 \*\*Strongest SNP marker in modified random-effects trans-ethnic meta-analysis across three race/ethnic groups (African, Hispanic/Latina, and Asian Americans).  
 Significant SNP associations below specific Bonferroni p-value for a given locus in bold. Nominal heterogeneity p-values in italics.  
 All SNPs are oriented on positive strand and positions based on Build 37.
