# Supplementary material for: The genetic underpinnings of variation in ages at menarche and natural menopause among women from the multi-ethnic Population Architecture using Genomics and Epidemiology (PAGE) Study: A trans-ethnic meta-analysis
Source: PubMed Central journal article supplement (PMC6059436; doi:10.1371/journal.pone.0200486), 2018-07-25
Supplement: pone.0200486.s006.pdf [file pone.0200486.s006.pdf]

Supplemental Table 4: Descriptive statistics for the sample used in analysis of age at natural menopause

|                            |                                | African American (total n=7,298) |                 |                              |              |                | Hispanic/Latina American (total n=5,271) |                  |                  |                           |                              | Asian American (total n=4,347) |                |                             |               |              | American Indian/Alaskan Native (total n=184) |               |               |               |
|----------------------------|--------------------------------|----------------------------------|-----------------|------------------------------|--------------|----------------|------------------------------------------|------------------|------------------|---------------------------|------------------------------|--------------------------------|----------------|-----------------------------|---------------|--------------|----------------------------------------------|---------------|---------------|---------------|
|                            |                                | ARIC                             | CARDIA          | HyperGen                     | MEC          | MESA           | WHI*                                     | HCHS/SOL         | MEC              | MEC SIGMA Diabetes Cases* | MEC SIGMA Diabetes Controls* | MESA                           | BioME*         | WHI                         | MEC Hawaiian  | MEC Japanese | MESA                                         | WHI           | WHI           |               |
| Age at report (years)      | N                              | 569                              | 150             | 189                          | 1598         | 583            | 4209                                     | 1940             | 416              | 225                       | 61                           | 509                            | 93             | 2027                        | 567           | 1822         | 299                                          | 1659          | 184           |               |
|                            | Mean (SD)                      | 56 (4.8)                         | 53 (2.3)        | 58 (8.7)                     | 61 (7.9)     | 64 (8.9)       | 62 (7.1)                                 | 58 (6.5)         | 60 (6.7)         | 61 (7.0)                  | 60 (7.0)                     | 63 (9.4)                       | 55 (4.1)       | 61 (6.8)                    | 58 (7.1)      | 61 (7.4)     | 64 (9.3)                                     | 63 (7.4)      | 62 (7.7)      |               |
|                            | Min, Max<br>Median             | 45, 65<br>56                     | 44, 56<br>54    | 40, 79<br>57                 | 45, 77<br>62 | 46, 83<br>65   | 50, 79<br>62                             | 42, 76<br>58     | 45, 75<br>60     | 47, 75<br>60              | 45, 62<br>61                 | 50, 79<br>63                   | 45, 75<br>63   | 45, 76<br>55                | 45, 76<br>60  | 45, 76<br>57 | 45, 84<br>61                                 | 45, 76<br>65  | 45, 84<br>63  | 50, 79<br>61  |
| Smoking Status             | N                              | 567                              | 147             | 182                          | 1583         | 583            | 4124                                     | 1938             | 400              | 213                       | 60                           | 509                            | 20             | 1981                        | 565           | 1813         | 299                                          | 1652          | 181           |               |
|                            | Never                          | 329                              | 88              | 54                           | 768          | 297            | 2078                                     | 1228             | 245              | 134                       | 40                           | 322                            | N/A            | 1303                        | 272           | 1227         | 285                                          | 1189          | 95            |               |
|                            | Ever                           | 98                               | 32              | 91                           | 565          | 187            | 1566                                     | 392              | 108              | 59                        | 15                           | 125                            | N/A            | 555                         | 180           | 435          | 9                                            | 393           | 68            |               |
|                            | Current<br>% Current           | 140<br>24.7                      | 27<br>18.4      | 37<br>20.3                   | 250<br>15.8  | 99<br>17.0     | 480<br>11.6                              | 318<br>16.4      | 47<br>11.8       | 20<br>9.4                 | 5<br>8.3                     | 62<br>12.2                     | 20<br>N/A      | 123<br>6.2                  | 113<br>20.0   | 151<br>8.3   | 5<br>1.7                                     | 70<br>4.2     | 18<br>9.9     |               |
| Birth Year                 | N                              | 569                              | 150             | 189                          | 1598         | 583            | 4209                                     | 1940             | 416              | 225                       | 61                           | 509                            | 93             | 2027                        | 567           | 1822         | 299                                          | 1659          | 184           |               |
|                            | Mean (SD)                      | 1931 (4.9)                       | 1957 (2.5)      | 1938 (8.7)                   | 1931 (7.5)   | 1937 (8.9)     | 1934 (7.0)                               | 1951 (6.6)       | 1933 (6.8)       | 1932 (7.0)                | 1933 (6.9)                   | 1938 (9.4)                     | 1958 (4.1)     | 1935 (6.7)                  | 1935 (7.2)    | 1932 (7.3)   | 1937 (9.3)                                   | 1932 (7.4)    | 1934 (7.6)    |               |
|                            | Min, Max                       | 1921, 1944                       | 1954, 1967      | 1918, 1956                   | 1918, 1948   | 1918, 1958     | 1915, 1950***                            | 1933, 1969       | 1918, 1948       | 1918, 1948                | 1919, 1946                   | 1917, 1956                     | 1951, 1968     | 1915, 1950***               | 1915, 1950*** | 1918, 1953   | 1918, 1953                                   | 1917-1956     | 1915, 1950*** | 1915, 1950*** |
|                            | Median                         | 1931                             | 1956            | 1940                         | 1930         | 1936           | 1934                                     | 1952             | 1934             | 1933                      | 1932                         | 1938                           | 1958           | 1936                        | 1932          | 1936         | 1932                                         | 1936          | 1932          | 1935          |
| Age at Menopause (years)** | N                              | 569                              | 150             | 189                          | 1598         | 583            | 4209                                     | 1940             | 416              | 225                       | 61                           | 509                            | 93             | 2027                        | 567           | 1822         | 299                                          | 1659          | 184           |               |
|                            | Mean (SD)                      | 48.3 (4.1)                       | 48.8 (3.4)      | 47.2 (4.7)                   | 49.0 (4.9)   | 50.0 (4.5)     | 48.5 (4.2)                               | 48.6 (4.5)       | 49.4 (4.5)       | 49.6 (4.0)                | 49.7 (4.0)                   | 50.2 (4.0)                     | 49.3 (4.4)     | 49.7 (4.0)                  | 50.2 (4.0)    | 49.3 (4.4)   | 49.7 (4.0)                                   | 50.2 (4.0)    | 49.3 (4.4)    |               |
|                            | Min, Max                       | 40, 60                           | 40, 55          | 40, 60                       | 40, 60       | 40, 60         | 40, 60                                   | 40, 60           | 40, 60           | 40, 60                    | 40, 60                       | 40, 60                         | 40, 60         | 40, 60                      | 40, 60        | 40, 60       | 40, 60                                       | 40, 60        | 40, 60        |               |
|                            | Median                         | 49                               | 49              | 47                           | 49           | 50             | 49                                       | 49               | 50               | 49                        | 50                           | 50                             | 50             | 50                          | 50            | 50           | 50                                           | 50            | 50            |               |
| Weight (kg)                | N                              | 569                              | 149             | 189                          | 1560         | 583            | 4196                                     | 1936             | 411              | 220                       | 61                           | 509                            | 93             | 2022                        | 567           | 1821         | 299                                          | 1659          | 182           |               |
|                            | Mean (SD)                      | 82.1 (18.1)                      | 200.1 (50.0)    | 87.8 (19.6)                  | 77.9 (16.9)  | 81.0 (17.3)    | 82.1 (18.8)                              | 73.9 (15.6)      | 70.6 (13.2)      | 71.1 (13.7)               | 66.5 (12.4)                  | 72.1 (14.3)                    | 78.4 (20.5)    | 71.4 (15.3)                 | 74.8 (17.8)   | 57.6 (10.1)  | 57.3 (9.4)                                   | 59.4 (12.6)   | 76.5 (16.4)   |               |
|                            | Min, Max                       | 39.5, 158.8                      | 104.0, 376.5    | 45.4, 149.2                  | 42.6, 181.4  | 39.5, 158.8    | 39.0, 171.5                              | 34.5, 163.0      | 46.7, 124.7      | 47.6, 124.7               | 46.7, 120.2                  | 44.2, 133.2                    | 43.5, 158.8    | 38.2, 165.0                 | 44.0, 170.1   | 35.4, 113.4  | 35.9, 112.5                                  | 32.0, 163.8   | 46.5, 144.0   |               |
|                            | Median                         | 78.5                             | 193.5           | 85.3                         | 74.8         | 78.5           | 79.5                                     | 71.7             | 68.5             | 68.0                      | 65.8                         | 69.9                           | 74.4           | 70.8                        | 56.7          | 57.6         | 57.4                                         | 57.4          | 75.2          |               |
| Height (cm)                | N                              | 569                              | 149             | 189                          | 1579         | 583            | 4177                                     | 1939             | 414              | 223                       | 61                           | 509                            | 93             | 2012                        | 566           | 1820         | 299                                          | 1651          | 182           |               |
|                            | Mean (SD)                      | 163.0 (6.12)                     | 164.4 (6.6)     | 161.5 (19.6)                 | 163.7 (6.5)  | 161.9 (6.6)    | 162.3 (6.9)                              | 155.1 (6.2)      | 158.9 (6.5)      | 158.9 (6.3)               | 157.8 (4.9)                  | 154.8 (6.0)                    | 159.1 (6.2)    | 157.1 (6.4)                 | 162.2 (6.3)   | 155.1 (5.4)  | 154.9 (5.7)                                  | 154.8 (5.8)   | 161.4 (6.8)   |               |
|                            | Min, Max                       | 148.0, 185.0                     | 150.0, 181.0    | 147.0, 176.0                 | 139.7, 198.1 | 136.9, 183.3   | 95.0, 194.1                              | 133.0, 176.2     | 190.5, 191.1     | 121.9, 190.5              | 121.9, 177.8                 | 147.3, 167.6                   | 138.4, 178.8   | 101.6, 97.0                 | 144.8, 149.9  | 177.1, 210.8 | 124.5, 188.0                                 | 137.8, 171.9  | 101.0, 177.9  | 144.6, 188.3  |
|                            | Median                         | 163.0                            | 164.0           | 161.0                        | 162.6        | 161.4          | 162.5                                    | 155.0            | 157.5            | 157.5                     | 157.5                        | 155.0                          | 127.0          | 157.2                       | 162.6         | 154.9        | 154.9                                        | 154.7         | 161.1         |               |
| BMI (kg/m2)                | N                              | 569                              | 149             | 189                          | 1549         | 583            | 4158                                     | 1936             | 410              | 219                       | 61                           | 509                            | 93             | 2009                        | 566           | 1819         | 299                                          | 1651          | 181           |               |
|                            | Mean (SD)                      | 30.99 (6.79)                     | 33.7 (8.6)      | 66.62 (7.07)                 | 29.13 (6.11) | 30.91 (6.46)   | 30.95 (6.67)                             | 30.67 (5.88)     | 28.01 (5.02)     | 28.24 (5.33)              | 26.72 (4.54)                 | 30.03 (5.49)                   | 30.87 (7.24)   | 28.82 (5.74)                | 28.47 (6.31)  | 23.97 (3.92) | 23.86 (3.51)                                 | 24.65 (4.59)  | 29.33 (6.03)  |               |
|                            | Min, Max                       | 16.25, 60.62                     | 20.6, 65.3      | 16.26, 55.14                 | 15.09, 64.70 | 15.87, 61.86   | 15.18, 69.18                             | 15.62, 62.07     | 17.79, 52.07     | 17.79, 52.07              | 18.88, 44.19                 | 18.3, 52.48                    | 17.42, 58.23   | 15.54, 65.99                | 15.54, 58.86  | 12.16, 47.34 | 16.63, 43.67                                 | 13.49, 65.61  | 17.31, 49.81  |               |
|                            | Median                         | 29.70                            | 32.10           | 32.47                        | 28.21        | 30.04          | 30.02                                    | 29.94            | 27.40            | 27.18                     | 26.58                        | 29.30                          | 29.99          | 27.97                       | 27.33         | 23.46        | 23.77                                        | 23.87         | 28.58         |               |
| Obesity                    | N                              | 569                              | 149             | 189                          | 1549         | 583            | 4158                                     | 1936             | 410              | 219                       | 61                           | 509                            | 93             | 2009                        | 566           | 1819         | 299                                          | 1651          | 181           |               |
|                            | Yes, >=30,000kg/m <sup>2</sup> | 277                              | 94              | 119                          | 582          | 302            | 2084                                     | 953              | 126              | 67                        | 12                           | 257                            | 51             | 714                         | 185           | 135          | 16                                           | 165           | 74            |               |
|                            | No, <30,000kg/m <sup>2</sup>   | 292                              | 55              | 70                           | 967          | 281            | 2074                                     | 983              | 284              | 152                       | 49                           | 252                            | 42             | 1295                        | 381           | 1684         | 283                                          | 1486          | 107           |               |
|                            | % Obese                        | 48.7                             | 63.1            | 63.0                         | 37.6         | 51.8           | 50.1                                     | 49.2             | 30.7             | 30.6                      | 19.7                         | 50.5                           | 54.8           | 35.5                        | 32.7          | 7.4          | 5.4                                          | 10.0          | 40.9          |               |
| Center/Region              | N                              | 569                              | 150             | 189                          | 1598         | 583            | 4209                                     | 1940             | 416              | 225                       | 61                           | 509                            | 93             | 2027                        | 567           | 1822         | 299                                          | 1659          | 184           |               |
|                            | Forsyth: 91                    | Birmingham: 29                   | Birmingham: 145 | Los Angeles/Hawaii****: 1598 | WFU: 146     | Northeast: 915 | Bronx: 487                               | Los Angeles: 416 | Los Angeles: 225 | Los Angeles: 61           | WFU: 0                       | Mount Sinai: 93                | Northeast: 374 | Hawaii/Los Angeles****: 567 | Hawaii: 1416  | WFU: 0       | Northwest: 99                                | Northwest: 29 |               |               |
|                            | Jackson: 478                   | Chicago: 37                      | Forsyth: 44     | COL: 111                     | South: 1864  | Chicago: 399   | COL: 171                                 | South: 836       | Los Angeles: 406 | JFU: 0                    | South: 106                   | South: 46                      |                |                             |               |              |                                              |               |               |               |
|                            | Minneapolis: 30                | Oakland: 54                      | JHU: 165        | Midwest: 977                 | Miami: 650   | San Diego: 404 | JHU: 0                                   | Midwest: 80      | UMN: 0           | Midwest: 89               | Midwest: 18                  |                                |                |                             |               |              |                                              |               |               |               |

\*Imputed MetaboChip SNP dosages used for MEC SIGMA, BioME, and part of WHI African American (n=2276) analytic samples. All other studies contributed only MetaboChip genotypes.

\*\*For studies with continuous measures of age at menopause (ARIC, CARDIA, HCHS/SOL, HyperGen, MESA, BioME, WHI).

\*\*\*Minimum/maximum birth years for WHI rounded down/up to the nearest 5 year increment.

\*\*\*\*Pooled across MEC study sites due to small sample from Hawaii for African and Hispanic/Latina American women (n<5), and from Los Angeles for Hawaiian women (n<5). MESA Asian American women from Columbia University in New York City were pooled due to small sample size (n<5).

N/A= Not available
