# Supplementary material for: The genetic underpinnings of variation in ages at menarche and natural menopause among women from the multi-ethnic Population Architecture using Genomics and Epidemiology (PAGE) Study: A trans-ethnic meta-analysis
Source: PubMed Central journal article supplement (PMC6059436; doi:10.1371/journal.pone.0200486), 2018-07-25
Supplement: pone.0200486.s007.pdf [file pone.0200486.s007.pdf]

**Supplemental Table 5.** Using the set of SNPs in high LD ( $r^2 \geq 0.8$ )\* with European index SNP in African, Hispanic, and Asian American populations to narrow of the region\*\*

| Gene                     | Index GWAS SNP | Chr | Position  | Number of SNPs in LD ( $r^2 \geq 0.8$ )* |         |          |       | European  |           |        | African   |           |        | Hispanic/Latino |           |        | East Asian |           |        | % Reduction** |
|--------------------------|----------------|-----|-----------|------------------------------------------|---------|----------|-------|-----------|-----------|--------|-----------|-----------|--------|-----------------|-----------|--------|------------|-----------|--------|---------------|
|                          |                |     |           | European                                 | African | Hispanic | Asian | Start pos | End pos   | Range  | Start pos | End pos   | Range  | Start pos       | End pos   | Range  | Start pos  | End pos   | Range  |               |
| <b>MENARCHE</b>          |                |     |           |                                          |         |          |       |           |           |        |           |           |        |                 |           |        |            |           |        |               |
| <i>SEC16B</i>            | rs633715       | 1   | 177852580 | 54                                       | 10      | 12       | 16    | 177793822 | 177913519 | 119697 | 177855517 | 177882786 | 27269  | 177855517       | 177881651 | 26134  | 177855517  | 177889480 | 33963  | 78            |
| <i>TMEM18</i>            | rs2947411      | 2   | 614168    | 216                                      | 1       | 1        | 35    | 600575    | 653874    | 53299  | 615627    | 615627    | 0      | 615627          | 615627    | 0      | 613044     | 635864    | 22820  | 100           |
| <i>TRIM66</i>            | rs4929923      | 11  | 8639200   | 28                                       | 3       | 33       | 46    | 8473707   | 8694073   | 220366 | 8636105   | 8683639   | 47534  | 8636105         | 8694073   | 57968  | 8636105    | 8694073   | 57968  | 78            |
| <i>BDNF</i>              | rs7103411      | 11  | 27700125  | 42                                       | 5       | 29       | 38    | 27634373  | 27742447  | 108074 | 27703188  | 27728539  | 25351  | 27666984        | 27742447  | 75463  | 27643725   | 27749725  | 106000 | 77            |
| <i>GPRC5B</i>            | rs12446632     | 16  | 19935389  | 70                                       | 7       | 10       | 31    | 19707417  | 19977733  | 270316 | 19931360  | 19942331  | 10971  | 19931114        | 19942331  | 11217  | 19717915   | 19994023  | 276108 | 96            |
| <i>FTO</i>               | rs9939609      | 16  | 53820527  | 88                                       | 25      | 37       | 39    | 53799507  | 53845169  | 45662  | 53816275  | 53822651  | 6376   | 53810546        | 53822651  | 12105  | 53809247   | 53822651  | 13404  | 86            |
| <b>NATURAL MENOPAUSE</b> |                |     |           |                                          |         |          |       |           |           |        |           |           |        |                 |           |        |            |           |        |               |
| <i>FNDC4</i>             | rs2303369      | 2   | 27715416  | 142                                      | 20      | 43       | 131   | 27548038  | 27752692  | 204654 | 27566989  | 27714526  | 147537 | 27566989        | 27740404  | 173415 | 27527246   | 27738854  | 211608 | 28            |

\*Other than the index SNP. 1000 Genomes phase 1 samples used to capture European (CEU), African (YRI), Hispanic/Latino (MXL, PUR, CLM), and East Asian (JPT) linkage disequilibrium patterns.

\*\*% Reduction is defined by:  $1 - (\text{Population with minimum range}) / (\text{Population with maximum range}) \times 100\%$

All SNPs are oriented on positive strand and positions based on Build 37.
