# Supplementary material for: The genetic underpinnings of variation in ages at menarche and natural menopause among women from the multi-ethnic Population Architecture using Genomics and Epidemiology (PAGE) Study: A trans-ethnic meta-analysis
Source: PubMed Central journal article supplement (PMC6059436; doi:10.1371/journal.pone.0200486), 2018-07-25
Supplement: pone.0200486.s009.pdf [file pone.0200486.s009.pdf]

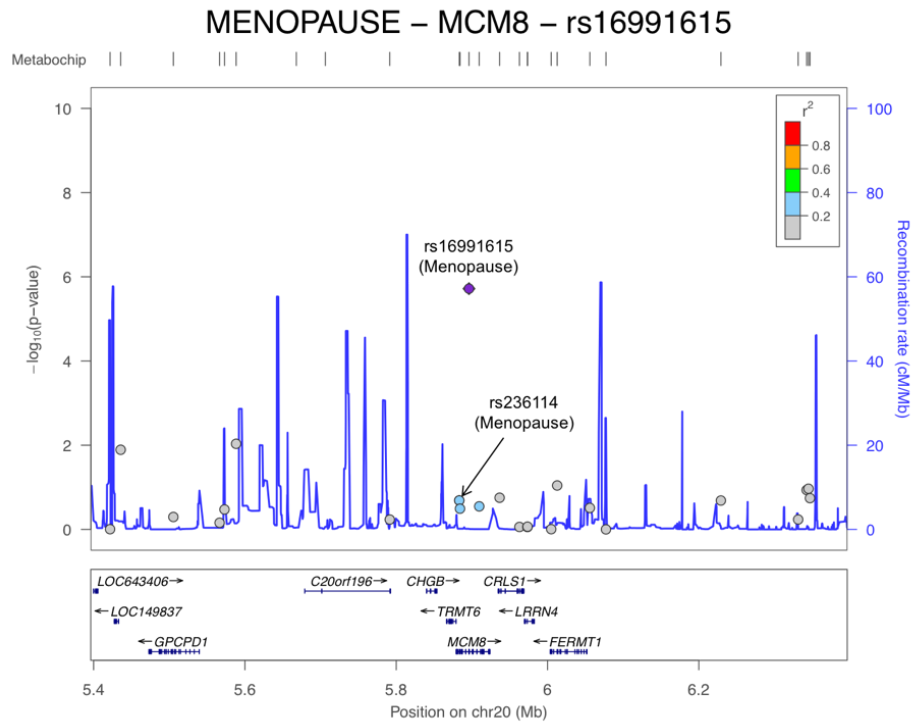

**Supplemental Figure 2:** Regional plot for trans-ethnic Bonferroni-significant association signal between *MCM8* and ANM using a modified random-effects trans-ethnic meta-analysis of more than 16,000 women
