# Supplementary material for: The genetic underpinnings of variation in ages at menarche and natural menopause among women from the multi-ethnic Population Architecture using Genomics and Epidemiology (PAGE) Study: A trans-ethnic meta-analysis
Source: PubMed Central journal article supplement (PMC6059436; doi:10.1371/journal.pone.0200486), 2018-07-25
Supplement: pone.0200486.s013.pdf [file pone.0200486.s013.pdf]

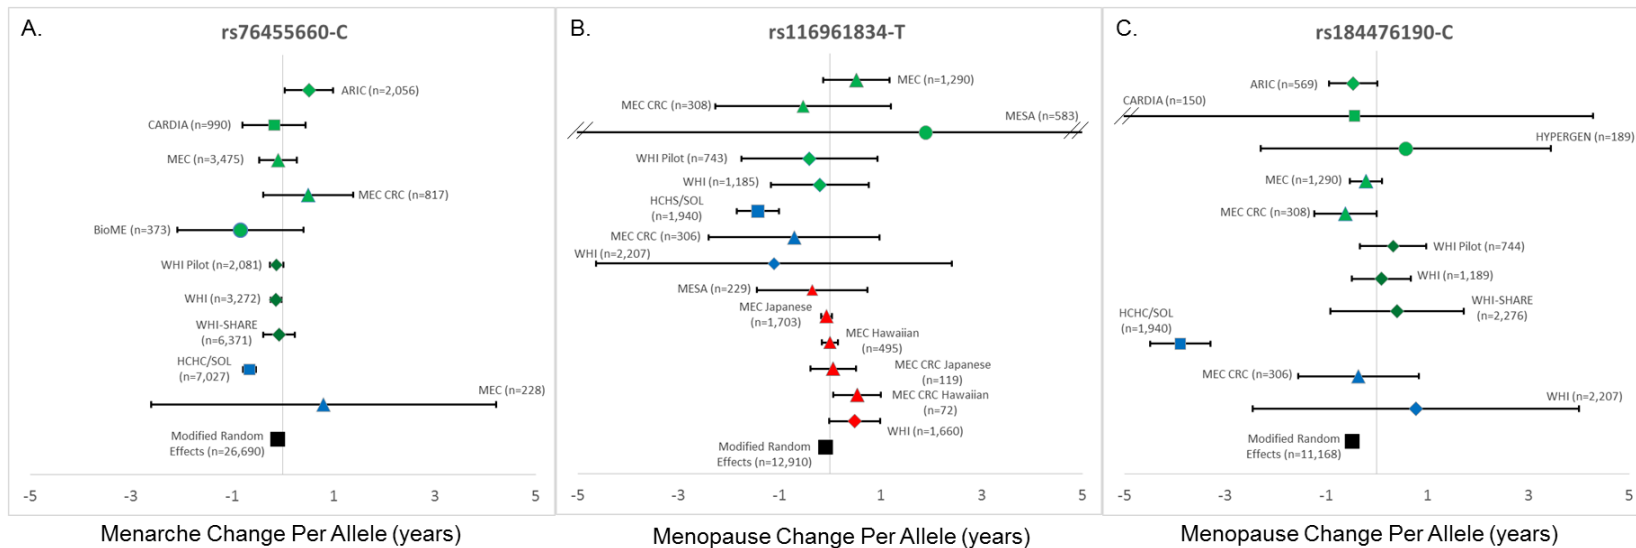

**Supplemental Figure 6:** Forest plots of three novel array-wide significant modified random-effect estimates ( $p$ -values  $< 4 \times 10^{-8}$ ; shown by the black box) and the contributing race/ethnic (African American in green; Hispanic/Latina in blue; Asian American in red) and study-specific effect estimates and their 95% confidence intervals (with double bars indicating full range not shown)
