# Supplementary material for: The genetic underpinnings of variation in ages at menarche and natural menopause among women from the multi-ethnic Population Architecture using Genomics and Epidemiology (PAGE) Study: A trans-ethnic meta-analysis
Source: PubMed Central journal article supplement (PMC6059436; doi:10.1371/journal.pone.0200486), 2018-07-25
Supplement: pone.0200486.s014.pdf [file pone.0200486.s014.pdf]

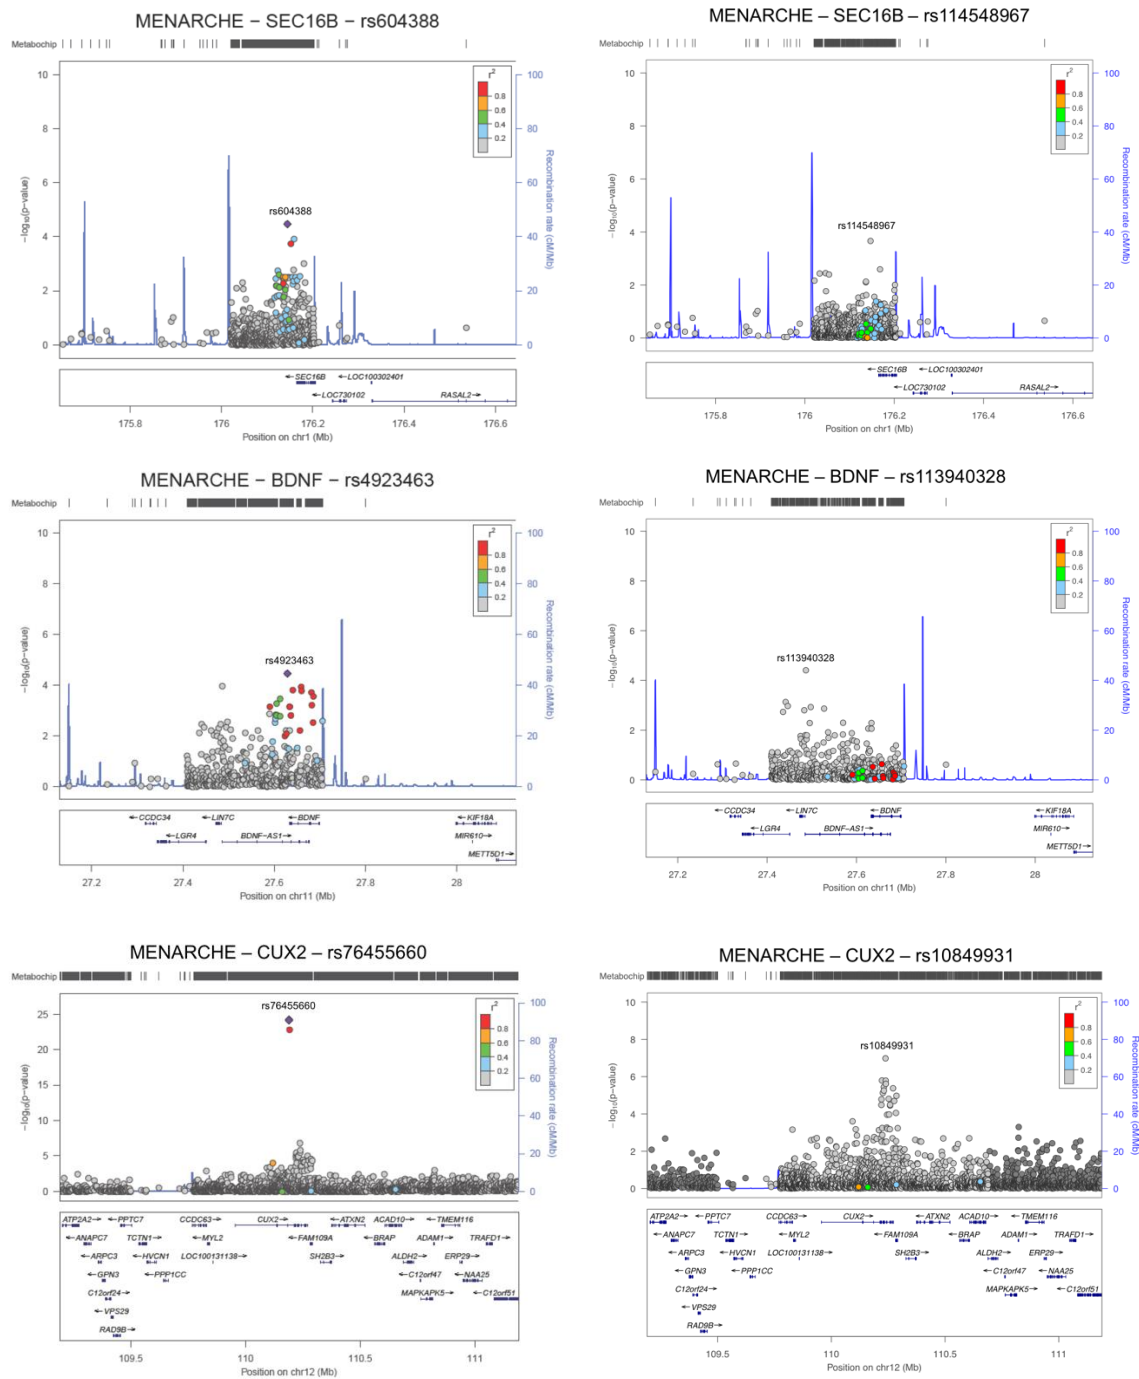

**Supplemental Figure 7:** Regional plots of unconditional findings (left;  $r^2$  based off of significant lead unconditional SNP) and approximate conditional findings after accounting for top SNPs in the region (right;  $r^2$  based off of unconditional lead SNP, noting significant lead conditional SNP) with age at menarche at *SEC16B*, *BDNF*, and *CUX2* in more than 31,000 women
